# Supplementary material
Source: Research Square preprint supplement (doi:10.21203/rs.3.rs-9604902/v1)
Supplement: Supplementary file 1 [file 15419dfb98a0471b89afc8bf.docx]

**Table 1**

*Descriptives*

| **Characteristics** | **Frequency (%)** |
| --- | --- |
| **Gender** |  |
| Women | 63 (61.2) |
| Men | 40 (38.8) |
| **Age group** |  |
| <25 | 50 (48.54 ) |
| 25-50 | 41 (39.81) |
| >50 | 12 (11.6) |
| **Illness Duration** |  |
| 0-2 years | 12 (11.65) |
| 2-5 years | 9 (8.74) |
| 5-7 years | 5 (4.85) |
| 7-10 years | 5 (4.85) |
| 10+ years | 72 (69.90) |
| **Occupational Environment** |  |
| Indoor and outdoor both | 53 (51.5) |
| Indoor only | 27(26.2) |
| Outdoor only | 10 (9.7) |
| Not working | 13 (12.6) |
| **Family History** |  |
| Yes | 32 (31.1) |
| No | 71 (68.9) |
| **Currently on treatment** |  |
| Only creams | 40 (38.83) |
| Topical steroids | 22 (21.36) |
| Systemics | 18 (17.48) |
| Alternatives | 23 (23.33) |
| **Diagnosis** |  |
| Vitiligo | 42 (40.78) |
| Psoriasis | 17 (16.50) |
| Eczema | 13 (12.62) |
| Acne Vulgaris | 19 (18.45) |
| Others | 12 (11.65) |
| **Socioconomic Status** |  |
| Lower | 6 (5.8) |
| Upper Lower | 23 (22.3) |
| Lower Middle | 41 (39.8) |
| Upper Middle | 33 (32.1) |

*Note. N=*103. Patients had a mean age of 27.70 years (±10.35 years).

**Table 2**

*Diagnosis by Gender*

| Diagnosis | Gender | | | |  |  |
| --- | --- | --- | --- | --- | --- | --- |
| Men | | Women | |  |  |
| *N* | % | *N* | % | *χ2* | *p* |
| Vitiligo | 21 | 58.3 | 21 | 38.2 |  |  |
| Psoriasis | 10 | 27.8 | 7 | 12.7 | 12.72 | 0.005* |
| Eczema | 3 | 8.3 | 10 | 18.2 |  |  |
| Acne Vulgaris | 2 | 5.6 | 17 | 30.9 |  |  |
| Total | 36 | 100 | 55 | 100 |  |  |

*Note*. The overall model of association between dermatological diagnoses by gender was significant, χ2 (3, N=91) = 12.72, *p* = 0.005, *V* = 0.374. **p*<0.05

**Table 3**

Diagnosis by Occupation Environment

| Diagnosis | Occupational Environment | | | | | | | |  |  |  |  |  |  |
| --- | --- | --- | --- | --- | --- | --- | --- | --- | --- | --- | --- | --- | --- | --- |
| Indoor only | | Outdoor only | | Indoor and Outdoor Both | | Not Working | |  |  |  |  |  |  |
| *N* | *%* | *N* | *%* | *N* | *%* | *N* | *%* | *χ2**p*  6.15 0.15 |  |  |  |  |  |
| Vitiligo | 6 | 27.3 | 4 | 66.7 | 27 | 51.9 | 5 | 45.4 |  |  |  |  |  |
| Psoriasis | 5 | 22.7 | 1 | 16.7 | 9 | 17.3 | 2 | 18.2 |  |  |  |  |  |
| Eczema | 4 | 18.2 | 1 | 16.6 | 6 | 11.5 | 2 | 18.2 |  |  |  |  |  |
| Acne Vulgaris | 7 | 31.8 | 0 | 0 | 10 | 19.3 | 2 | 18.2 |  |  |  |  |  |
| Total | 22 | 100 | 6 | 100 | 52 | 100 | 11 | 100 |  |  |  |  |  |

*Note*. The overall model of association between dermatological diagnoses by Occupational Environment was not significant, *χ2* (9, N=91) = 6.15, *p* = 0.72, *V* = 0.15**.**

**Table 4**

*Disease prevalence by Socioeconomic Status*

| Diagnosis | Socioeconomic Status | | | | | | | |  |  |
| --- | --- | --- | --- | --- | --- | --- | --- | --- | --- | --- |
| Lower | | Upper Lower | | Lower Middle | | Upper Middle | |  |  |
| *N* | *%* | *N* | *%* | *N* | *%* | *N* | *%* | *χ2* | *p* |
| Vitiligo | 3 | 50.0 | 8 | 40.0 | 19 | 51.4 | 12 | 42.9 |  |  |
| Psoriasis | 2 | 33.3 | 5 | 25.0 | 7 | 18.9 | 3 | 10.7 |  |  |
| Eczema | 1 | 16.7 | 3 | 15.0 | 6 | 16.2 | 3 | 10.7 | 8.08 | 0.52 |
| Acne Vulgaris | 0 | 0 | 4 | 20.0 | 5 | 13.5 | 10 | 35.7 |  |  |
| Total | 6 | 100 | 20 | 100 | 37 | 100 | 28 | 100 |  |  |

*Note*. The overall model of association between dermatological diagnoses by Socioeconomic Status was not significant, *χ2* (9, N=91) = 8.08, *p* = 0.52, *V* = 0.29.

**Table 5**

*Disease prevalence by Age groups*

| Diagnosis | Age Group | | | | | |  |  |
| --- | --- | --- | --- | --- | --- | --- | --- | --- |
| Young | | Middle | | Old | |  |  |
| *N* | *%* | *N* | *%* | *N* | *%* | *χ2* | *p* |
| Vitiligo | 14 | 30.0 | 28 | 71.8 | 0 | 0 |  |  |
| Psoriasis | 7 | 15.2 | 7 | 17.9 | 3 | 50.0 |  |  |
| Eczema | 8 | 17.4 | 3 | 7.7 | 2 | 33.3 | 29.27 | <0.001* |
| Acne Vulgaris | 17 | 37.0 | 1 | 2.6 | 1 | 16.7 |  |  |
| Total | 46 | 100 | 39 | 100 | 6 | 100 |  |  |

*Note*. The overall model of association between dermatological diagnoses by age groups was significant, *χ2* (9, N=91) = 29.27, *p*<0.001, *V* = 0.56. **p*<0.05

**Table 6**

*Dermatological life Quality as per diagnoses*

| Diagnosis | Dermatological Life Quality | | | |
| --- | --- | --- | --- | --- |
| *N* | Mean Ranks | Kruskal Wallis *H* | *p* |
| Vitiligo | 42 | 38.04 | 16.01 | 0.001* |
| Psoriasis | 17 | 53.94 |
| Eczema | 13 | 68.96 |
| Acne Vulgaris | 19 | 40.79 |
| Total | 46 | 100 |

*Note*. The overall model of difference in DLQI scores among dermatological diagnoses was significant, *H* (3, *N* = 91) = 16.01, *p* = 0.001. **p*<0.05

**Table 7**

*Gender differences in Dermatological Life Quality Index Scores*

|  | DLQI | | | |
| --- | --- | --- | --- | --- |
| Gender | *N* | Mean Ranks | Mann Whitney *U* | *p* |
| Men | 36 | 45.49 | 1008.50 | 0.88 |
| Women | 55 | 46.34 |
| Total | 91 |  |

*Note*. The overall model of difference in DLQI scores among genders was not significant, *U* (*N* = 91) = 1008.5, *p* = 0.88.

**Table 8**

*Differences in Dermatological Life Quality Index Scores among* *those who have and those who not have family history*

|  | DLQI | | | |
| --- | --- | --- | --- | --- |
| Family history | *N* | Mean Ranks | Mann Whitney *U* | *p* |
| Yes | 30 | 50.12 | 1038.50 | 0.29 |
| No | 61 | 43.98 |
| Total | 91 |  |

*Note*. The overall model of difference in DLQI scores among those who have and those who not have family history was not significant, *U* (*N* = 91) = 1038.5, *p* = 0.29.

**Table 9**

*Dermatological life Quality as per treatment category*

| Treatment | Dermatological Life Quality | | | |
| --- | --- | --- | --- | --- |
| *N* | Mean Ranks | Kruskal Wallis *H* | *p* |
| Only Creams | 61 | 40.51 | 11.01 | 0.012* |
| Topical Steroids | 4 | 76.75 |
| Systemic | 10 | 49.95 |
| Alternatives | 16 | 56.78 |
| Total | 91 |  |

*Note*. The overall model of difference in DLQI scores among treatment categories was significant, *H*(3, *N* = 91) = 11.01, *p* = 0.012. **p*<0.05

**Table 10**

*Dermatological life Quality as per illness duration category*

| Illness Duration | Dermatological Life Quality | | | |
| --- | --- | --- | --- | --- |
| *N* | Mean Ranks | Kruskal Wallis *H* | *p* |
| 0-2 years | 21 | 51.38 | 2.76 | 0.599 |
| 2-5 years | 7 | 48.93 |
| 5-7 years | 5 | 35.30 |
| 7-10 years | 15 | 49.90 |
| 10+ years | 43 | 42.78 |
| Total | 91 |  |

*Note*. The overall model of difference in DLQI scores among illness duration categories was not significant, *H*(4, *N* = 91) = 2.76, *p* = 0.599.

**Table 11**

Firth Logistic Regression *predicting DLQI impact*

| Predictor | *B* | S.E. | *Wald Z* | *p* | Odds Ratio (OR) | 95% CI for OR | |
| --- | --- | --- | --- | --- | --- | --- | --- |
|  |  |  |  |  |  | LL | UL |
| Gender(Ref:Male) |  |  |  |  |  |  |  |
| Female | -0.30 | 0.46 | -0.66 | 0.50 | 0.73 | 0.29 | 1.79 |
| Occupational Environment(Ref:Not working) |  |  |  |  |  |  |  |
| Indoor only | -0.17 | 0.77 | -0.22 | 0.81 | 0.84 | 0.18 | 3.65 |
| Outdoor only | 0.60 | 0.94 | 0.64 | 0.52 | 1.82 | 0.28 | 12.53 |
| Indoor and outdoor both | -0.49 | 0.72 | -0.68 | 0.47 | 0.61 | 0.14 | 2.33 |
| Socioeconomic status(Ref:Lower) |  |  |  |  |  |  |  |
| Upper Lower | -0.13 | 1.06 | -0.12 | 0.89 | 0.87 | 0.11 | 6.78 |
| Lower Middle | -0.35 | 1.13 | -0.31 | 0.71 | 0.70 | 0.09 | 4.82 |
| Upper Middle | 0.06 | 1.02 | 0.06 | 0.94 | 1.06 | 0.14 | 7.90 |
| Treatment type(Ref:Only Creams) |  |  |  |  |  |  |  |
| Topical Steroids | 2.54 | 1.47 | 1.72 | 0.03* | 12.68 | 1.22 | 1722.36 |
| Systemics | 0.57 | 0.93 | 0.62 | 0.38 | 1.78 | 0.48 | 7.05 |
| Alternatives | 1.24 | 0.66 | 1.89 | 0.03* | 3.48 | 1.11 | 12.71 |

*Note.* Results derived from Bias-Reduced (Firth) Logistic Regression due to quasi-complete separation. The outcome variable is DLQI. *p<0.05

|  |
| --- |
